# Supplementary material for: STAT3 Is Activated by JAK2 Independent of Key Oncogenic Driver Mutations in Non-Small Cell Lung Carcinoma
Source: PLOS journal article supplement (doi:10.1371/journal.pone.0030820), 2012-02-02
Supplement: S3 (10.1371/journal.pone.0030820.s003) [file journal.pone.0030820.s003]

| Cell line | EGFR          | KRAS | STK11 | CDKN2A | PIK3CA | TP53       | PDGFRA    | MET | CTNNB1 |
|-----------|---------------|------|-------|--------|--------|------------|-----------|-----|--------|
| HCC4006   | L747-A750 del | -    | -     |        |        |            |           |     |        |
| HCC827    | E746-A750 del | -    | -     |        |        |            |           | amp |        |
| A549      | -             | G12S | Q37*  | del    | -      | -          |           | -   | -      |
| NCI-H358  | -             | G12C | -     | -      | -      | -          |           |     | T75A   |
| NCI-H460  | -             | Q61H | Q37*  | del    | E545K  | -          |           | -   | -      |
| NCI-H1703 | -             | -    | -     | D84V   | -      | c.919-1G>T | amp;S478P |     |        |
| NCI-H1993 | -             | -    | E199* | del    | -      | C242W      |           | amp | -      |

**Supplemental Table S1. NSCLC Cell Line Mutational Profile.**

Mutational status of common oncogenes and tumor suppressors in the seven NSCLC lines used for this study were obtained from the Catalogue of Somatic Mutations in Cancer (COSMIC) database [\[47\]](#).
