# Supplementary material for: STAT3 Is Activated by JAK2 Independent of Key Oncogenic Driver Mutations in Non-Small Cell Lung Carcinoma
Source: PLOS journal article supplement (doi:10.1371/journal.pone.0030820), 2012-02-02
Supplement: S5 (10.1371/journal.pone.0030820.s005) [file journal.pone.0030820.s005]

| <b>Clinical factors</b>                                      |                                         | <b>Results</b>   |
|--------------------------------------------------------------|-----------------------------------------|------------------|
| <b>Median Age, yr (Range) N=297</b>                          |                                         | 70.4 (34.6-93.4) |
| <b>Gender (%) N=297</b>                                      |                                         |                  |
|                                                              | Female                                  | 161 (54.2)       |
|                                                              | Male                                    | 136 (45.8)       |
| <b>Disease stage (%) N=297</b>                               |                                         |                  |
|                                                              | IA                                      | 131 (44.1)       |
|                                                              | IB                                      | 96 (32.3)        |
|                                                              | 2A                                      | 47 (15.8)        |
|                                                              | 2B                                      | 23 (7.8)         |
| <b>Histology (%) N=297</b>                                   |                                         |                  |
|                                                              | Adenocarcinoma                          | 187 (63.0)       |
|                                                              | Squamous cell carcinoma                 | 84 (28.3)        |
|                                                              | Large cell carcinoma                    | 10 (3.4)         |
|                                                              | BAC*                                    | 9 (3.0)          |
|                                                              | NSCLC-NOS**                             | 7 (2.3)          |
| <b>Smoking status (%) N=283</b>                              |                                         |                  |
|                                                              | Smokers                                 | 262 (92.6)       |
|                                                              | Never smokers                           | 21 (7.4)         |
| <b>Median pack/year (Range) N=141</b>                        |                                         | 50 (6-200)       |
| <b>How Chemotherapy Delivered (%) N=42</b>                   |                                         |                  |
|                                                              | Neoadjuvant                             | 1 (2.4)          |
|                                                              | Adjuvant                                | 35 (83.3)        |
|                                                              | Concurrent with radiation               | 6 (14.3)         |
| <b>Type of Chemotherapy Delivered (%) N=42</b>               |                                         |                  |
|                                                              | Carboplatin-based regimen               | 13 (31.0)        |
|                                                              | Cisplatin-based regimen                 | 5 (11.9)         |
|                                                              | Other                                   | 24 (57.1)        |
| <b>Radiation therapy (%) N=38</b>                            |                                         |                  |
|                                                              | Definitive radiation                    | 29 (76.3)        |
|                                                              | Adjuvant radiation                      | 9 (23.7)         |
| <b>Outcome &amp; Mutational Statistics</b>                   |                                         |                  |
| <b>Median Overall Survival, in months (range) N=296</b>      |                                         | 38.8 (0.4-110.5) |
| <b>Disease recurrence? N=270</b>                             |                                         |                  |
|                                                              | No                                      | 145 (53.7)       |
|                                                              | Yes                                     | 125 (46.3)       |
| <b>Median Relapse-free Survival, in months (range) N=270</b> |                                         | 31.7 (0.4-110.5) |
| <b>Immunohistochemistry (% positive)</b>                     |                                         |                  |
|                                                              | STAT3 N = 245                           | 229 (93.5)       |
|                                                              | p-STAT3 <sup>Y705</sup> N=245           | 53 (21.6)        |
|                                                              | Jak2 N= 245                             | 194 (79.2)       |
| <b>Mutational status (%) N = 270</b>                         |                                         |                  |
|                                                              | K-Ras mutation, exon 1 codons 12 and 13 | 70 (26.0)        |
|                                                              | EGFR mutation, exon 19                  | 15 (5.6)         |
| *BAC: bronchoalveolar carcinoma                              |                                         |                  |
| **NOS: non-otherwise specified                               |                                         |                  |

**Supplemental Table S3. Patient disease characteristics and outcome statistics.**

Key clinical, histological and treatment features, as well as outcome statistics, of the patient population represented on our tissue microarray are indicated. Mutational status for KRAS and EGFR are also shown for this population.
